# Supplementary material for: Identification and Characterization of miRNA Transcriptome in Potato by High-Throughput Sequencing
Source: PLoS One. 2013 Feb 21;8(2):e57233. doi: 10.1371/journal.pone.0057233 (PMC3578796; doi:10.1371/journal.pone.0057233)
Supplement: Table S2 — Summary of conserved and potato specific miRNA families. The table shows the conserved miRNA families according to the family number corresponding to our analysis. The number of family members is indicated with mature miRNA and star sequences. The homologue of miRNA is shown (miRNA family) with the length of miRNA (miRNA length). For potato specific miRNAs the family number, numbers of miRNAs in the same family, mature and star sequences and miRNA length are indicated. During the analysis DNA equivalent of RNA sequence was used. (XLSX) [file pone.0057233.s003.xlsx]

## Sheet: Conserved_miRNAs
family	number of family members	miRNA sequence	Star sequence	miRNA family	miRNA length
135	1	TCTGCATTTGCACCTGCACCT	GTGTTGGTGCTCATGCAGACA	miR530	21
150	7	CTGACAGAAGAGAGTGAGCA,TGACAGAAGAGAGTGAGCAC	CTCACTTCTCTTTCTGTCAATC,GCTCACGCTCTATCTGTCACA,GCTCACTGCTCTATCTGTCACC,GCTTACTCTCTATCTGTCACC	miR156	20,20
118	4	TTGACAGAAGATAGAGAGCAC	GCTCTCTATGCTTCTGTCATCA,GCTCTCTATTCTTCTGTCATCA,GCTCTTTATTCTTCTGTCACCA,GCTCTTTATTCTTCTGTCATCA	miR156	21
113	2	TGCCTGGCTCCCTGTATGCCA	GCGTATGAGGAGCCAAGCATA,GCGTGCGAGGAGCCAAGCATA	miR160	21
112	2	TCGATAAACCTCTGCATCCAG	GGAGGCAGCGGTTCATCGATC	miR162	21
103	4	TCGGACCAGGCTTCATTCCCC,TCGGACCAGGCTTCATTCCTC	AGAATGTCGTCTGGTTCGAGA,GGAATGTTGTCTGGCTCGAGG,GGAATGTTGTTTGGCTCGAGG,GGAATGTTGTTTGGTTCGAAA	miR166	21,21
122	4	TGAAGCTGCCAGCATGATCTA	GATCATGTGGCAGCATCACC,GATCATGTGGCAGCCTCACC,GATCATGTGGTTGCTTCACC,GGTCATGCTCGGACAGCCTCACT	miR167	21
151	8	TAGCCAAGGATGACTTGCCT	GCAAGCATCCTTGGCGACT,GCAAGTTATCCTGGCTATC,GCAGGTCATCTTTAGCTAACT,GCAGTCATCTATGGCTTTG,GCAGTCATCTTGGGCTATC,GCAGTCTCCTTGGCTACC,GCAGTCTCCTTGGCTACT	miR169	20
104	2	TATTGGCCTGGTTCACTCAGA	TGATTGAGCCGTGCCAATATC,TGATTGAGCCGTGTCAATATC	miR171	21
102	1	TTGAGCCGCGTCAATATCTCT	AGATATTGATGTGGCTCAATC	miR171	21
120	1	TTGAGCCGTGCCAATATCACG	AGATATTGGTGCGGTTCAATT	miR171	21
125	1	TGAGCCGAACCAATATCACTC	GTGATATTGGTTCGGCTCACT	miR171	21
148	1	TGATTGAGCCGTGCCAATATC	TGTTGGTGTGGTTCAATTAGA	miR171	21
114	5	AGAATCTTGATGATGCTGC,AGAATCTTGATGATGCTGCAT,GGAATCTTGATGATGCTGCAG	AGCATCTTCAAGATTCACA,GCAACATCATCAAGATTCACA,GCAGCACCATCAAGATTCACA,GTAGCATAATCAAGATTCACA,GGAGCATCATCAAGATTCACA	miR172	19,21,21
111	2	TTGGACTGAAGGGAGCTCCCT,TTGGACTGAAGGGAGCTCCT	AGAGCTTTCTTCGGTCCACAC,GAGCTCCTTTCAGGCCAAGA	miR319	21,20
88	1	TCGCAGGAGAGATGGCACTTAG	AAGTGCCTCTGTCTTTCGACA	miR3627	22
145	1	AAGCTCAGGAGGGATAGCACC	CGCTATCCATCTTGAGTTTTA	miR390	21
132	1	ATCATGCGATCTCTTCGGAAT	TCCAAAGGGATCGCATTGATCC	miR393	21
152	1	TTGGCATTCTGTCCACCTCC	AGGGGGCCAAAGTGCCAAAC	miR394	20
107	12	CTGAAGTGTTTGGGGGAACTC	GTTCCCTTGACCACTTCATCA,GTTCCCTTGACCACTTCATGA,GTTCCCTTGACCACTTCATTA,GTTCTCTTGACCGCTTCATTA,GTTTCCTTGACCACTTCATGA,GTTTCCTTGACCACTTCATGAT	miR395	21
140	1	TTCCACAGCTTTCTTGAACTT	GTCCAAGAAAGCTGTGGGAAA	miR396	21
144	1	ATTGAGTGCAGCGTTGATGAC	CATCAACGCTACACTCAATCA	miR397	21
136	1	TATGTTCTCAGGTCGCCCCTG	GGGTTGATTTGAGAACATATG	miR398	21
139	1	TTGTGTTCTCAGGTCACCCCT	GAGTGTGCCTTAGAACACAGGT	miR398	21
106	1	TGCCAAAGGAGAGTTGCCCTA	GGGCTACACTCTATTGGCATG	miR399	21
131	6	CGCCAAAGGAGAGCTGCCCTG	GGGCTACTCTCTATTGGCATA,GGGCTACTCTCTATTGGCATG	miR399	21
141	2	TGCACAGCCTCTTCCCTGGTT,TGCACTGCCTCTTCCCTGGCT	ACAGGGACGAGGCAGCGCATG,ACGGGGACGAGACAGAGCATG	miR408	21,21
110	1	TACGCAGGAGAGATGATGCTG	GCATCATACTCCTGCATATT	miR4376	21
133	1	CCTCTCCCTCAAGGGCTTCTC	GAAGCTCTAGCAGGGAGAGCCA	miR477	21
134	1	ACTCTCCCTCAAAGGCTTCTG	GAGGTCTTTCGAGTGAGAGTGA	miR477	21
90	1	TTTCCAATTCCACCCATTCCTA	GGAATTGGTGGATTGGAAAGC	miR482	22
96	1	TCTTGCCAATACCGCCCATTCC	AGTGGGTGGTGTGGTAAGATT	miR482	22
97	1	TTACCGATTCCCCCCATTCCAA	GGAGTGGGTGGCATGGTAAGA	miR482	22
98	1	TCTTGCCTACACCGCCCATGCC	CGTGAGTGGTGGGGTAAGATA	miR482	22
29	4	AACATTTTTGAAGAGTCTGAGCAA,AATATTTTTGAAGAGTCTGAGCAA,ATATTTTTGAAGAGTCTGAGCAAC	GCTCAAACTCTCCAAAATTGTTGC,GCTCGGACTATTCAAATTGCTGC,TACTCGTACTCTCCAAAAATGTTG,TGCTCGGACCCTCAAAAGATGTTC	miR5303	24,24,24
93	1	TTTTAGCAAGAGTTGTTTTCCC	AGAAACAACACTTGCTAAAAGA	miR6024	22
92	1	TTCTTGGCTAGAGTTGTATTGC	AATACAACTATTGCCAAGACAA	miR6026	22
157	1	TTCGATACGCACCTGAA	TAGGGCTATCGATAAGGGT	miR6149	17
109	1	TTAGATGAACATCAACAAACA	TTTGTTGATGGTCATCTATTC	miR827	21

## Sheet: Potato_Specific_miRNA
family	number of family members	miRNA sequence	Star sequence	miRNA length
0	1	AGGTACATGAACTCTAACGAGGCA	CATTTGTTAGATTCAAGACTTGC	24
1	1	ATGAGATGAAGTCAATGTTTGGAC	TTGGACATACGATTTTATCTCGTGA	24
2	1	AAGCGACGGACAACATCTCTTAGT	TTAGAGATGTTTTCCATCGCTTTT	24
3	1	ATAGGACTTTAGTTTAGTTAAGGT	GTTAATTAAACTATGGTCCTATTA	24
4	2	AAGTTGGATGATAATAATATATAT	ATATATTAATTATCGTTTTGATTTAT	24
5	2	AGGGTTGTGACTTCTTGAAAAGGT	TTTTTCAATAAGTTATGACTTTTC,TTTTTCAATAAGTTGTGACTTTTC	24
6	1	ACTAATGCCGGTAAAGACTTTAAC	TAAAGTCTTTAGCGACATTGGTTC	24
7	2	ATACCGAACTTTGGAAATGACCTT	GATTTTCCATAAAGTTTGGTATCG,GGTCTTTCATAAAATTTGGTATCG	24
8	1	CGGGCTTGCCTAGAACGGGTTACC	TTTGCCTTCTGGGTCGAGCTCGTC	24
9	5	TTTTGGAGAATCCGACACGCACCC	ACCCATGTCGGATTCTCCAAAATA,ACCCGTCTCGGATTCTCCAAAAAT,ACCCGTGTCGGGTTCTCCAAAAAT,ACCCGTGTTGGATTCTCCGAAAAT,ACCCGTGTTGGATTTCCAAAAAT	24
10	1	AGTTTAAAACGTTACTGTCGGTAA	ACTGATGGTAATGTTTTAAGTTTA	24
11	1	ACACTAGTTGATCTTATTGATGAC	CTTCTAGTAAGATCGATTTGTGT	24
12	1	ACGATACCAAACTTTATGAAGGAC	CCTTCATAAAGTTTGGTATCGTAA	24
13	1	AGAGATCGGTTTTTATTGTAATTC	TTTGCATAAAAACCGATTACTTG	24
14	1	AACGGAAAAGGGCCAAAAATACCC	GTGTTTTTAGCCCTTTTCCGTAT	24
15	1	ACAAATAAGTCCATTACCTGAACC	TTCAGTTAATGGTCTATTATGTCT	24
16	1	AGGGTTGTGACTTTTCTGAAGAGT	TTTTCAATGAGTTATAATTTTTC	24
17	1	AAAAAAGCGACGGACAGCGTCTCT	AGATGTTGTCCGTCGCTTCTTTAA	24
18	2	CTTCAACTTTGAATGTGCACAAGT,TTTCAACTTTGAGTGTGCACAAGT	TTATGCATACCCAAAGTCGGAGAG,TTGTGCACACCCTAAGCTGGAGGA	24,24
19	1	TTCAAATGATCGTAACTTTGGCCT	GCCAAAGTTATGACCATTTGAAGT	24
20	3	AGGAGGTCGGAATTTTTAATGAAT	ACAATAAAAACCGACCTCCTGA,ACAATAAAAACCGACCTCTTGA	24
21	1	TTTGACAATGCACATCTAGACACT	TGTCTAGATGTGCATTTCAAAGT	24
22	6	ATGGTATCGTGAGATGAAATCAGC	TGATTTCATCTCATGATTCCATAT	24
23	4	ATATTTTATGTGGTTAACTTAACT	TTAAGTTAACCACATAAAATATGT,TTAAGTTAACCATATAAAATATGT,TTAAGTTAATTATATAAGATATAT	24
24	1	GATTTGGTAGTTGGTGTTCTTGAA	AGAGGATACGTTACCAATGGTCGA	24
25	1	AGGATTGTGACTTTTTCAAAGAGT	TCTCTGAAAAGGCACAACCAGA	24
26	2	ATATTATACTTGGGCATAAACTCC	AGTTTATGCCCAAGTATAATACAT,AGTTTATGCCCAAGTATATAATATAT	24
27	1	TTACACGTAGACAAGTTGACCATT	TGGTTTAACTTGTCTACGTATAATG	24
28	3	ATGTGGTACATATGAAATTTGAAA	TGAAATTTCATTTGTATCACATAA	24
30	3	ATATTGCTCGGACTCTTCAAAAAT,ATGCTGCTCGGACTCTTCAAA	TTTTGGAGAGTCCGAGCAACATTT,TAGAGAGTGCGAGCAACATAC,TGAAGAGCCAGCACAACTTAG	24,21
31	1	ACGGACCGTAGATCAATCCACAGT	TGTAGACTGATCTATGGACTGTAA	24
32	1	AATTGAATAAGTAGACACACGTGT	GTGTGTGTCTATTTATTCAACGTT	24
33	1	AAGAACATTGAAAGAAAACTGATC	TTAATTTTCTTTTTTTGTTCATTAT	24
34	1	ACGACCCGTAGAACTGCCCACGAC	CTGGGTCACTTCTACGGGTCCTTC	24
35	1	ACACCGAAGAACTGACACCGAAGA	TTCGGTTCGGTTTTTCGGTATTT	24
36	5	TGAACAAGTAGACACATACGTCCT,TGAACAAGTAGACACATGCGTCCT	GATACATGTATCTATTTATTCAAC,AATGCATGCGTATATTTGTTCAAT,GACACATGTGTCAATTTGTTCAGC,GACACATGTGTTTATTTGTTTAAT,GACGTGTGTATCTATTTGTTCAAC	24,24
37	1	TCCTGGGGATTAGTATGAAAATTC	ATTTTCATACTAATTCCTAGAAAA	24
38	1	TTTTTCGTGATAATAATGGAATCA	ATTCCATTATTATCAAGAAAAAAG	24
39	1	ATTTCGGTATACAAATGGGATGAC	CAAGACCCATTTGTATACCAAAATAT	24
40	1	AAGAGTTGTGACTTTTTCAAAGGG	TTTTTAAAGAGTTGTGACTTTTCC	24
41	1	AGGGGTTGTGTATGTGTTTGGCCT	GCTAAATACATCTATATCCGTTTTA	24
42	1	TCGTCCGTCGTTTTTAATTAAAAA	TTTTTAAAAAGCGACGGACGACG	24
43	3	TTTAGAGTTTAAGGTTTAGAGTTT	ACTCTAAATTTTAAATTCTAAATC,GATTTAGGGTTTAGAGTTTAGGGT,GGTTTAGTGTTTAGAATTTAGGAT	24
44	1	TAGTTTTTGGACGACAGGGGCACC	TGCCCTGCCGTCCAAAAAATAGA	24
45	1	TTTGAGTATGCACAAGTAGACACT	TGCCTACTTGTGCACACACAAAGT	24
46	1	ATGTGGCACTTTTCGGATTTTGAG	CGAAAAATGAAAAGTGCCACATAA	24
47	1	GAGATGAGATCAATGTTTGGACAT	TTTCATATTGATTTCATCTCAT	24
48	2	ATTTCCAGAAAAGCGACGGACAGT	AGTCCATCACTTTTCTGGGATTTT,TGTCCGTCGCTTTTTTAAGTTT	24
49	2	ATTTTTGGAGAATCTGACACGGGT,TTTTGGAGAATCTGACACGGGTGT	ACGTTCGGATTCTCCAAAAGTAA,GAGTGTGTCGGATTCTCCAACATT	24,24
50	1	ATTTTACGTTGATTTCATCTCATG	TGAGATGAGATTAACGTTTGGATAT	24
51	1	ATAGGACCCTAGTTAAATTTAGGT	CTAAATTTAACTAGGGTCCTACTA	24
52	1	AATAAAAAGAAGCCTCACACAACT	TTGTGTGAGGTTTCTTTTTGTTTC	24
53	1	ATGACTTTAAGTCGCGTCTGGCCC	GTTGCACGAGACAAAGAGTTATTT	24
54	1	AGAAGAAAATCGCTCCGTCAGAAG	TTTGATGTGCCATTTTTATTTAT	24
55	1	ATAAATATGTCATTTAACTTGGTC	CCAAATTAAAGGGCACATTTATAT	24
56	1	ATGAATACAATGTTTGGATAAATT	ATTGTTTCATATTGTATTGTATTT	24
57	1	ATGTGACACTTTTTGAATTTCGAG	CGAAAAATGAAAAGTACCACATAA	24
58	1	TATTGGATATTGAAAATGAAACTT	GTTTCATTTTCAAGGTCCAATAGC	24
59	1	ATTTTTGAATGGAAGGCCCATGTG	CATGGTCTTTTCTTTCAAAAATAT	24
60	1	ATCCAAGTGAAGTGTATCGTCTCA	GGAGGGTGCACCTCACTTAGATTT	24
61	1	ACTTTTCTGAAGGGTTGTGACCTT	GAGTTTTGACTTTCCTGAAGAGTTG	24
62	1	ACGAACCGTAGATCCCATCCGTGG	ACGGGGTCATCTATGGTTCGTGG	24
63	1	TTTGGGTGTGCACAAGTAGATACT	TGTCTATTTATGTACACTCATAAGT	24
64	1	AAAAGAATGACCTGGTTTGACTTG	AGGGAAGCAGGTCATTCTTTATG	24
65	1	ATGGGGATTAGTATGAAAATTTGC	GGATTTTCATACTAATTCCTAGAA	24
66	2	AGAAATTACTCATTAGTCGATGAT	CATTGACTAATGAGTAATTTCTGA,TATAGACTAATGAGTAATTTCTGA	24
67	1	GAATTTTCAAATGATCGTAACTTT	AGTTAAGGACGTTTGAACTTTCCC	24
68	1	AATTTCATTGAGTATGTTGTTGTT	CAACAACATACTTACTGAAATTCC	24
69	1	ATTCAAGGCTCAAACTCGAGACCT	GTGTCAAGTTCGAGTCTTGGACAT	24
70	1	TTTAAATGAGAATTTTGGACTATT	TAGTTTTAATTTTTTATTTAATTG	24
71	1	TTTGGCACAATTTCATTGGCAACC	TTGCCAATGAAATAATGCCAAAAA	24
72	2	TTGGAGGATTTGAAGATTTCAACT	TTGAAGAATTTAAAGACTTCAACT,TTGGAGGATTTAAAGACTTCAACT	24
73	1	ATGAGATGAAATTAGCGTTTGGAT	TTTACGTTGATTTCATCTCATGA	24
74	1	ACATACTCGACATGCAATTAAATT	TTTAATTGCATGCCAAGTGTGTGG	24
75	1	ATGTAGAGAATATGTGGTAACCCT	GGTTATGACGTAATCTAGTACGTCC	24
76	1	ATCCGAACTTTGACCGAAATTGCT	CAATTTCGGTCAAAGTTCGGATAT	24
77	2	GAGTAATTTATGAACAAGAAACCT	GTTTCTTGTTCATAAATTACTCAT	24
78	1	ATCTCGAGATAAGTTATTCTGGAC	TGAGAGCAACTTATCTTGAGATTT	24
79	1	GAGATGGAATCAGTGTTTGGACAT	GTCCAAACACTGATTCCATCTCAT	24
80	1	ACGAGACCAAACCAACCCGACATT	ATTTGGGTTGGTTTGGTTTCAACT	24
81	1	AAACCCAGAAAAGCGACGGACAGT	AGTCCGTAGTTTTTCTGGATTTTC	24
82	1	GTTCATAATTATAGTATAAGGATG	TCCTTATGCTACAATTGTGAACAA	24
83	1	AGCCATTTTTCTTTGTTTTGGAGC	TCCAAAACAAGAAAAAATGGTTCA	24
84	1	TTGGGTTGGTTTGGTCTCGGGTT	TTAAAACCAAATCAACCCAAAT	23
85	1	TCACCTTCAGAATTGTAGATTTC	AATCTACAAGTGTGAAGGTGAGT	23
86	1	TTAGACACCTCAACTAAGACTTG	GGTCATTTTTGAGTGTTTAAGT	23
87	7	TGGTCGGCATGACTCCCGAGGT	AATGTGAGTCTGTGCGATTAGG,AGTGTGAGTCGGTGCGATTAGG,AGTGTGAGTCGGTGTGATTAGG,AGTGTGAGTTGGTGCGATTAGG	22
89	1	TTCCAAAGCTGCAGAAATGAGT	TCAATTCTGCAGCTTTAGGAGT	22
91	1	TATGACAAACACTGCAAAAACT	CTTTTGCAATGTTTGTCATACA	22
94	1	TCCATCTTCAATATCACTTTCT	AAAGTGACATTGGGATGGAGA	22
95	1	TATGTCTTTCCGATGCCTCCCA	GGAGGAATCGAAAGATATAAG	22
99	1	ATAATTTGGAGGAATAGGAACC	TTCCCTTTTCCGAAAGTGTAG	22
100	2	CCTTGTGAGTAAGTTGAATCTC	GTTCAACTTGCTCACTTGGAG	22
101	1	TTCGTGAGACAAAAAGAAGCCT	ACTCATTTTTGTCTCACAAAAA	22
105	1	TTTCCTATCTGAACTATCACC	TGATAGTTCATATAAAAAAAA	21
108	1	TTGGACTGAAGGGTTCCCTTC	AGGAAACTGTTTAGTCCAACC	21
115	1	CTTATAATTGTAATTATGATC	TCATAATTACAATTATAAGCC	21
116	2	ATGATGTATAGCAAAGAGCCT	GTGCTTTGCTATTTTCATTG	21
117	1	ATTAGACTGAAGTGCTGATCT	ATAAGCACTTCCGTCTAATTT	21
119	1	TGATATAATTGGACTTTGGCC	CCAAAGTCCGATTATATCAAC	21
121	1	TCTCCAGCGATATTTGAAACT	TTTCAAATATGGTTGGAGATG	21
123	1	ATTGATAGTTGAGGTGTGTTT	ACACCCTTCAATTATCATTTA	21
124	1	ACAGCGTTTCTCTGTATAACC	TTATACAGAGAAACCGCTGTCG	21
126	1	ACAAGTAGACACTCACGTCCT	GATGTGTGTGTCTAGTTGTTC	21
127	1	TATGATCGAAGTTTCAATGAC	CGCTGAAATTTCGATCATAAT	21
128	1	CCATTTTTTCGAAATTAGACC	TCTAGTTTCGAAAAAATTGTC	21
129	1	TTGCAACACACCTGAATCGTC	TGATTCAGGTTTGTATGCAAAC	21
130	8	GGGCTACTCTCTATTGGCATG	AACCAAGGGAGAGTTGTCCTA,CGCCAAAGGGGAGCTGCCCTA,TGCCAAAGGAGAGCTGCCCTG	21
137	1	AGATGGACATGCTAATGAACA	CTCATTAGCATCTCCATCTTG	21
138	1	CATGTGCTCTAGCTCTCCAGC	TGGAGAAGCAGGGCACATGCT	21
142	1	CAATGCAACATACTCATCACC	AGATGAGTATGGTGCATTGGA	21
143	1	CAAGGCTCATGCAGACATGCA	CATGTCTACATGAGCCTGATA	21
146	1	GGGTGTTGGTCGATTAAGACA	GCTTTATTGAGCCGCGCCACGG	21
147	1	TGACTTGAGATTCCTACTTGG	AAGTAGGAATCAAGGTCAAT	21
149	1	TGTCGCAGATGACTTTCGCCC	ACGAGAGTCATCTGTGACAGG	21
153	2	TTTCAAAAGGTTGTGACTTT	ATTTGTGACTTTTTCGAAGTA,TGTTGCGACTTTTTCGAACG	20
154	1	TAGTATGGTAGAAAGATTCA	TATTTCTTCTACCATACTATT	20
155	1	TTGGCTTTGGGCCTTTCCT	GTGGAAGGCGAAGACCAGAG	19
156	1	ATGTATTCAACGAGCTTA	AGTTTGTGATGCCCTTA	18
158	1	CGAGGCGCTGTCTACGA	TCAGGCGGTGAATTTCGAT	17
