# Supplementary material for: Identification and Characterization of miRNA Transcriptome in Potato by High-Throughput Sequencing
Source: PLoS One. 2013 Feb 21;8(2):e57233. doi: 10.1371/journal.pone.0057233 (PMC3578796; doi:10.1371/journal.pone.0057233)
Supplement: Table S5 — Oligonucleotide sequences used in this study. (XLSX) [file pone.0057233.s006.xlsx]

## Sheet: oligos for Northern blot
Oigo name	sequence	targeted miRNA
PotatoMir1005047020_as	TGGGAGGCATCGGAAAGACATA	PotatoMir1005047020
PotatoMir1005907528_as	GACGATTCAGGTGTGTTGCAA	PotatoMir1005907528
PotatoMir1005564753_as	GGGCGAAAGTCATCTGCGACA	PotatoMir1005564753
U6_as	GCTAATCTTCTCTGTATCGTTCC
